# Supplementary material for: Single-cell RNA-seq reveals CD16- monocytes as key regulators of human monocyte transcriptional response to Toxoplasma
Source: PubMed Central journal article supplement (PMC7713135; doi:10.1038/s41598-020-78250-0), 2020-12-03

Figure S1

**A**

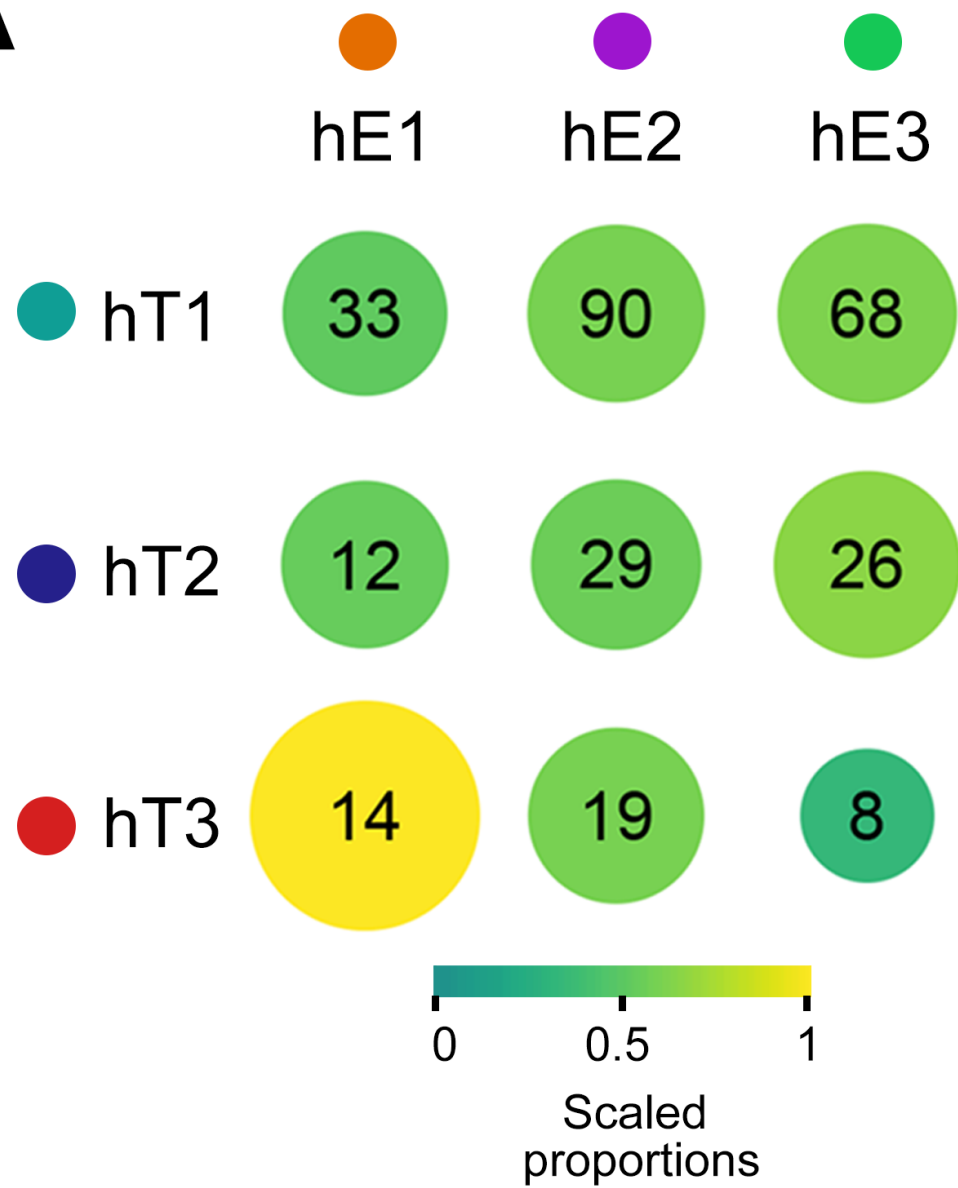

**B**

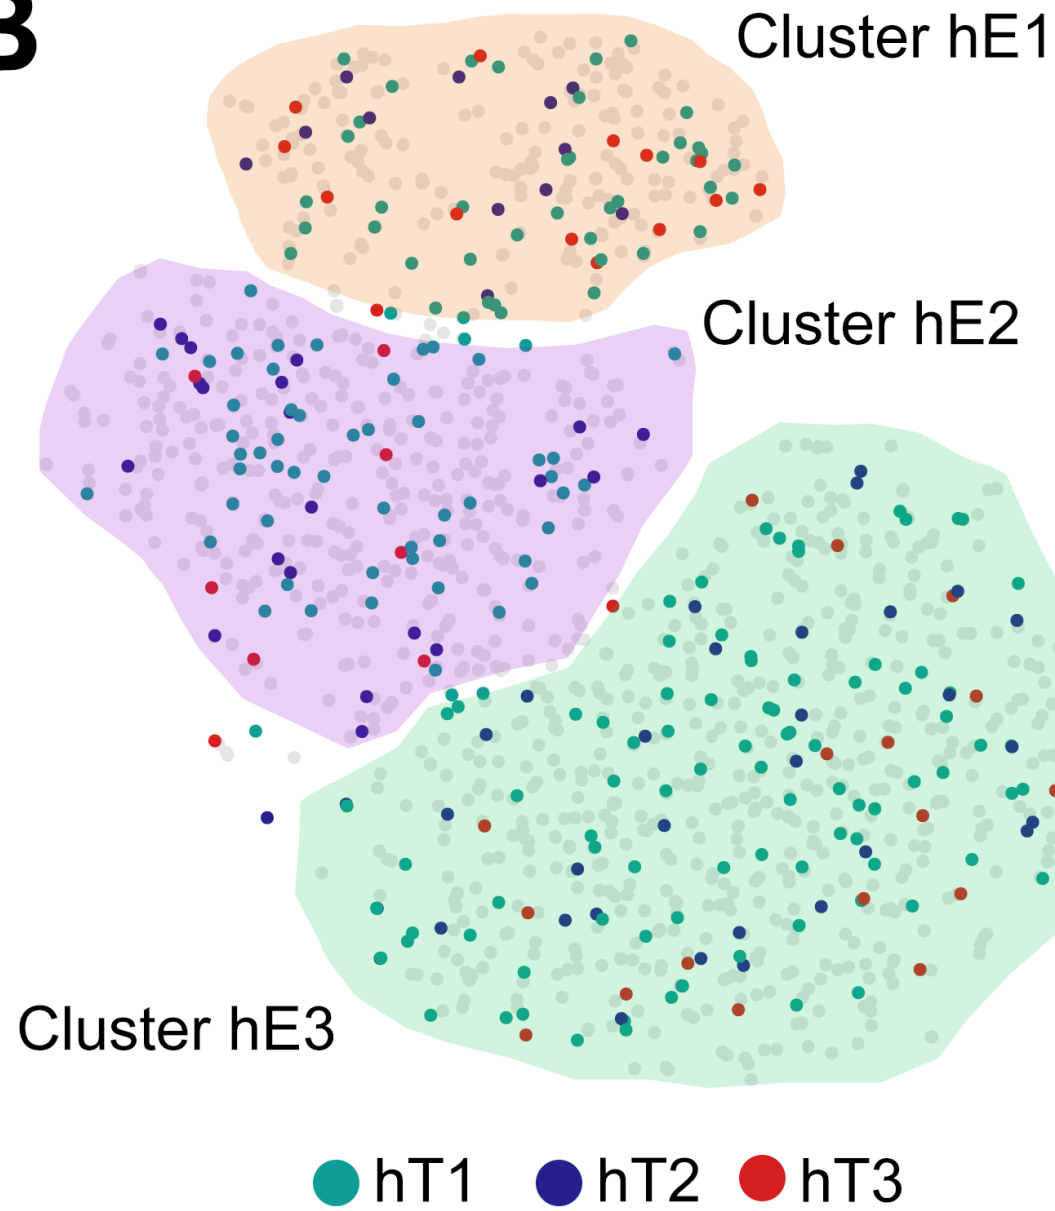

Supplement: 41598_2020_78250_MOESM1_ESM.pdf [file 41598_2020_78250_MOESM1_ESM.pdf]
